# Supplementary material for: A Drug Discovery Approach to a Reveal Novel Antioxidant Natural Source: The Case of Chestnut Burr Biomass
Source: MDPI journal article supplement (doi:10.3390/ijms25052517), 2024-02-21
Supplement: s1 [file s1]

| <b>Protein</b>                                  | <b>Uniprot</b> | <b>Organism</b> | <b>PDB</b> | <b>Method</b> | <b>Resolution (Å)</b> |
|-------------------------------------------------|----------------|-----------------|------------|---------------|-----------------------|
| Deoxyhypusine synthase                          | P49366         | Homo Sapiens    | 1DHS       | X-Ray         | 2.20                  |
| Stress-induced-phosphoprotein 1                 | P31948         | Homo Sapiens    | 1ELW       | X-Ray         | 1.60                  |
| Mitogen-activated protein kinase 14             | Q16539         | Homo Sapiens    | 1IAN       | X-Ray         | 2.00                  |
| Mitogen-activated protein kinase 10             | P53779         | Homo Sapiens    | 1JNK       | X-Ray         | 2.30                  |
| Nuclear receptor ROR-alpha                      | P35398         | Homo Sapiens    | 1N83       | X-Ray         | 1.63                  |
| RAC-beta serine/threonine-protein kinase        | P31751         | Homo Sapiens    | 1O6L       | X-Ray         | 1.60                  |
| Death-associated protein kinase 1               | P53355         | Homo Sapiens    | 1P4F       | X-Ray         | 1.90                  |
| L-xylulose reductase                            | Q7Z4W1         | Homo Sapiens    | 1PR9       | X-Ray         | 1.96                  |
| Deoxyhypusine synthase                          | P49366         | Homo Sapiens    | 1RLZ       | X-Ray         | 2.15                  |
| Amine oxidase [flavin-containing] B             | P27338         | Homo Sapiens    | 1S3E       | X-Ray         | 1.60                  |
| Serine/threonine-protein phosphatase 5          | P53041         | Homo Sapiens    | 1S95       | X-Ray         | 1.60                  |
| Glutaryl-CoA dehydrogenase, mitochondrial       | Q92947         | Homo Sapiens    | 1SIQ       | X-Ray         | 2.10                  |
| Protein kinase C delta type                     | Q05655         | Homo Sapiens    | 1YRK       | X-Ray         | 1.70                  |
| Amine oxidase [flavin-containing] B             | P27338         | Homo Sapiens    | 2BK3       | X-Ray         | 1.80                  |
| Amine oxidase [flavin-containing] B             | P27338         | Homo Sapiens    | 2C65       | X-Ray         | 1.70                  |
| Serine/threonine-protein kinase PAK 4           | O96013         | Homo Sapiens    | 2CDZ       | X-Ray         | 2.30                  |
| Tyrosine-protein kinase ABL1                    | P00519         | Homo Sapiens    | 2G1T       | X-Ray         | 1.80                  |
| Alpha-ketoglutarate-dependent dioxygenase       | Q96Q83         | Homo Sapiens    | 2IUW       | X-Ray         | 1.50                  |
| Alpha-aminoadipic semialdehyde dehydrogenase    | P49419         | Homo Sapiens    | 2J6L       | X-Ray         | 1.30                  |
| Pyruvate dehydrogenase (acetyl-transferring)    | Q15118         | Homo Sapiens    | 2Q8G       | X-Ray         | 1.90                  |
| 5'-AMP-activated protein kinase subunit gamma-1 | P54619         | Homo Sapiens    | 2UV4       | X-Ray         | 1.33                  |
| Amine oxidase [flavin-containing] B             | P27338         | Homo Sapiens    | 2V5Z       | X-Ray         | 1.60                  |
| Serine/threonine-protein kinase OSR1            | O95747         | Homo Sapiens    | 2VWI       | X-Ray         | 2.15                  |
| RAC-beta serine/threonine-protein kinase        | P31751         | Homo Sapiens    | 2X39       | X-Ray         | 1.93                  |
| Amine oxidase [flavin-containing] B             | P27338         | Homo Sapiens    | 2XFN       | X-Ray         | 1.60                  |
| Mitogen-activated protein kinase 8              | P45983         | Homo Sapiens    | 2XRW       | X-Ray         | 1.33                  |
| Amine oxidase [flavin-containing] A             | P21397         | Homo Sapiens    | 2Z5X       | X-Ray         | 2.20                  |
| Ribosomal protein S6 kinase alpha-1             | Q15418         | Homo Sapiens    | 2Z7Q       | X-Ray         | 2.00                  |
| Protein kinase C iota type                      | P41743         | Homo Sapiens    | 3A8X       | X-Ray         | 2.10                  |
| Death-associated protein kinase 3               | O43293         | Homo Sapiens    | 3BHY       | X-Ray         | 1.24                  |
| MAP kinase-activated protein kinase 3           | Q16644         | Homo Sapiens    | 3FHR       | X-Ray         | 1.90                  |
| MAP kinase-activated protein kinase 3           | Q16644         | Homo Sapiens    | 3FXW       | X-Ray         | 2.00                  |

|                                                |        |              |      |       |      |
|------------------------------------------------|--------|--------------|------|-------|------|
| Protein-tyrosine kinase 2-beta                 | Q14289 | Homo Sapiens | 3FZS | X-Ray | 1.75 |
| Heat shock-related 70 kDa protein 2            | P54652 | Homo Sapiens | 3I33 | X-Ray | 1.30 |
| Transforming protein RhoA                      | P61589 | Homo Sapiens | 3LW8 | X-Ray | 1.85 |
| Transforming protein RhoA                      | P61589 | Homo Sapiens | 3LXR | X-Ray | 1.68 |
| ADP-ribosylation factor 6                      | P62330 | Homo Sapiens | 3N5C | X-Ray | 1.82 |
| Mitogen-activated protein kinase 10            | P53779 | Homo Sapiens | 3OY1 | X-Ray | 1.70 |
| Tyrosine-protein kinase ABL1                   | P00519 | Homo Sapiens | 3PYY | X-Ray | 1.85 |
| MAP kinase-activated protein kinase 3          | Q16644 | Homo Sapiens | 3SHE | X-Ray | 2.25 |
| NAD-dependent protein deacetylase sirtuin-2    | Q8IXJ6 | Homo Sapiens | 3ZGV | X-Ray | 2.27 |
| Histone deacetylase 3                          | O15379 | Homo Sapiens | 4A69 | X-Ray | 2.06 |
| Amine oxidase [flavin-containing] B            | P27338 | Homo Sapiens | 4A7A | X-Ray | 1.70 |
| Phosphatidylinositol 4,5-bisphosphate 3-kinase | P48736 | Homo Sapiens | 4ANV | X-Ray | 2.13 |
| Cyclin-dependent-like kinase 5                 | Q00535 | Homo Sapiens | 4AU8 | X-Ray | 1.90 |
| Serine/threonine-protein kinase PAK 4          | O96013 | Homo Sapiens | 4FIH | X-Ray | 1.97 |
| Alpha-ketoglutarate-dependent dioxygenase FTO  | Q9C0B1 | Homo Sapiens | 4IE5 | X-Ray | 1.95 |
| NAD-dependent protein deacetylase sirtuin-1    | Q96EB6 | Homo Sapiens | 4KXQ | X-Ray | 1.85 |
| Prolyl 3-hydroxylase OGFOD1                    | Q8N543 | Homo Sapiens | 4NHX | X-Ray | 2.10 |
| Ribosomal protein S6 kinase alpha-3            | P51812 | Homo Sapiens | 4NW6 | X-Ray | 1.74 |
| Sphingosine-1-phosphate lyase 1                | O95470 | Homo Sapiens | 4Q6R | X-Ray | 2.40 |
| Serine/threonine-protein kinase 24             | Q9Y6E0 | Homo Sapiens | 4QMU | X-Ray | 1.55 |
| NAD-dependent protein deacetylase sirtuin-2    | Q8IXJ6 | Homo Sapiens | 4RMH | X-Ray | 1.42 |
| Nuclear receptor ROR-alpha                     | P35398 | Homo Sapiens | 4S15 | X-Ray | 1.90 |
| Iodotyrosine deiodinase 1                      | Q6PHW0 | Homo Sapiens | 4TTB | X-Ray | 2.45 |
| STE20-like serine/threonine-protein kinase     | Q9H2G2 | Homo Sapiens | 4USF | X-Ray | 1.75 |
| NAD-dependent protein deacetylase sirtuin-2    | Q8IXJ6 | Homo Sapiens | 4Y6L | X-Ray | 1.60 |
| Amyloid-beta precursor protein                 | P05067 | Homo Sapiens | 4YN0 | X-Ray | 2.20 |
| Serine/threonine-protein kinase PAK 1          | Q13153 | Homo Sapiens | 4ZJI | X-Ray | 1.99 |
| Transforming protein RhoA                      | P61586 | Homo Sapiens | 5A0F | X-Ray | 2.00 |
| Death-associated protein kinase 3              | O43293 | Homo Sapiens | 5A6N | X-Ray | 1.70 |
| Death-associated protein kinase 1              | P53355 | Homo Sapiens | 5AV4 | X-Ray | 1.40 |
| TRAF2 and NCK-interacting protein kinase       | Q9UKE5 | Homo Sapiens | 5AX9 | X-Ray | 2.40 |
| cGMP-dependent protein kinase 2                | Q13237 | Homo Sapiens | 5BV6 | X-Ray | 1.94 |
| NAD-dependent protein deacetylase sirtuin-2    | Q8IXJ6 | Homo Sapiens | 5D7O | X-Ray | 1.63 |

|                                                   |        |              |      |       |      |
|---------------------------------------------------|--------|--------------|------|-------|------|
| Ribosomal protein S6 kinase alpha-3               | P51812 | Homo Sapiens | 5D9L | X-Ray | 2.15 |
| Serine/threonine-protein kinase 3                 | Q13188 | Homo Sapiens | 5DH3 | X-Ray | 2.47 |
| NAD-dependent protein deacetylase sirtuin-2       | Q8IXJ6 | Homo Sapiens | 5DY4 | X-Ray | 1.77 |
| Mitogen-activated protein kinase 13               | O15264 | Homo Sapiens | 5EKO | X-Ray | 2.00 |
| Protein kinase C theta type                       | Q04759 | Homo Sapiens | 5F9E | X-Ray | 2.00 |
| Heat shock-related 70 kDa protein 2               | P54652 | Homo Sapiens | 5FPN | X-Ray | 1.96 |
| Tyrosine-protein kinase ABL1                      | P00519 | Homo Sapiens | 5HU9 | X-Ray | 1.53 |
| Cyclin-dependent kinase 2                         | P24941 | Homo Sapiens | 5K4J | X-Ray | 1.60 |
| Proteasome subunit alpha type-7                   | O14818 | Homo Sapiens | 5LF4 | X-Ray | 1.99 |
| Protein kinase C iota type                        | P41743 | Homo Sapiens | 5LI9 | X-Ray | 1.79 |
| ANXA2_HUMAN Annexin A2                            | P07355 | Homo Sapiens | 5N7D | X-Ray | 2.30 |
| Prolyl hydroxylase EGLN2                          | Q96KS0 | Homo Sapiens | 5V1B | X-Ray | 2.49 |
| Serine/threonine-protein kinase PAK 4             | O96013 | Homo Sapiens | 5VEF | X-Ray | 1.75 |
| Mitogen-activated protein kinase kinase kinase 20 | Q9NYL2 | Homo Sapiens | 5X5O | X-Ray | 1.87 |
| Transforming protein RhoA                         | P61586 | Homo Sapiens | 6BCB | X-Ray | 1.40 |
| cGMP-dependent protein kinase 2                   | Q13237 | Homo Sapiens | 6BQ8 | X-Ray | 2.00 |
| Glucose-6-phosphate 1-dehydrogenase               | P53779 | Homo Sapiens | 6E08 | X-Ray | 1.90 |
| Mitogen-activated protein kinase 10               | P11143 | Homo Sapiens | 6EMH | X-Ray | 1.76 |
| Mitogen-activated protein kinase 10               | P53779 | Homo Sapiens | 6EQ9 | X-Ray | 1.83 |
| Amine oxidase [flavin-containing] B               | P27338 | Homo Sapiens | 6FW0 | X-Ray | 1.60 |
| Heat shock protein 105 kDa                        | Q92598 | Homo Sapiens | 6GFA | X-Ray | 2.00 |
| Mitogen-activated protein kinase 1                | P28482 | Homo Sapiens | 6GJD | X-Ray | 1.58 |
| Cyclin-dependent kinase 2                         | P24941 | Homo Sapiens | 6GUK | X-Ray | 1.30 |
| Cyclin-dependent kinase 2                         | P24941 | Homo Sapiens | 6INL | X-Ray | 1.75 |
| DNA-(apurinic or apyrimidinic site) endonuclease  | P27695 | Homo Sapiens | 6MKK | X-Ray | 1.44 |
| Mitogen-activated protein kinase                  | Q92918 | Homo Sapiens | 6NFY | X-Ray | 2.17 |
| Deoxyhypusine synthase                            | P49366 | Homo Sapiens | 6P4V | X-Ray | 1.65 |
| Homeodomain-interacting protein kinase 2          | Q9H2X6 | Homo Sapiens | 6P5S | X-Ray | 2.19 |
| DNA-(apurinic or apyrimidinic site) endonuclease  | P27695 | Homo Sapiens | 6P94 | X-Ray | 2.09 |
| Cyclin-dependent kinase 2                         | P24941 | Homo Sapiens | 6Q4K | X-Ray | 1.06 |
| Amine oxidase [flavin-containing] B               | P27338 | Homo Sapiens | 6RKP | X-Ray | 1.70 |
| Mitogen-activated protein kinase 14               | Q16539 | Homo Sapiens | 6SFI | X-Ray | 1.60 |
| Annexin A2                                        | P07355 | Homo Sapiens | 6TWY | X-Ray | 2.30 |

|                                     |        |              |      |       |      |
|-------------------------------------|--------|--------------|------|-------|------|
| Deoxyhypusine synthase              | P49366 | Homo Sapiens | 6XXJ | X-Ray | 1.41 |
| Deoxyhypusine synthase              | P49366 | Homo Sapiens | 6XXM | X-Ray | 1.67 |
| Amine oxidase [flavin-containing] B | P27338 | Homo Sapiens | 6YT2 | X-Ray | 1.80 |
| Rho-associated protein kinase 2     | O75116 | Homo Sapiens | 7JNT | X-Ray | 2.21 |

**Table S1.** List of targets considered in this study.
